# Supplementary material
Source: PubMed Central journal article supplement (PMC2847529)
Supplement: E09-08-0672_1.pdf [file E09-08-0672_1.pdf]

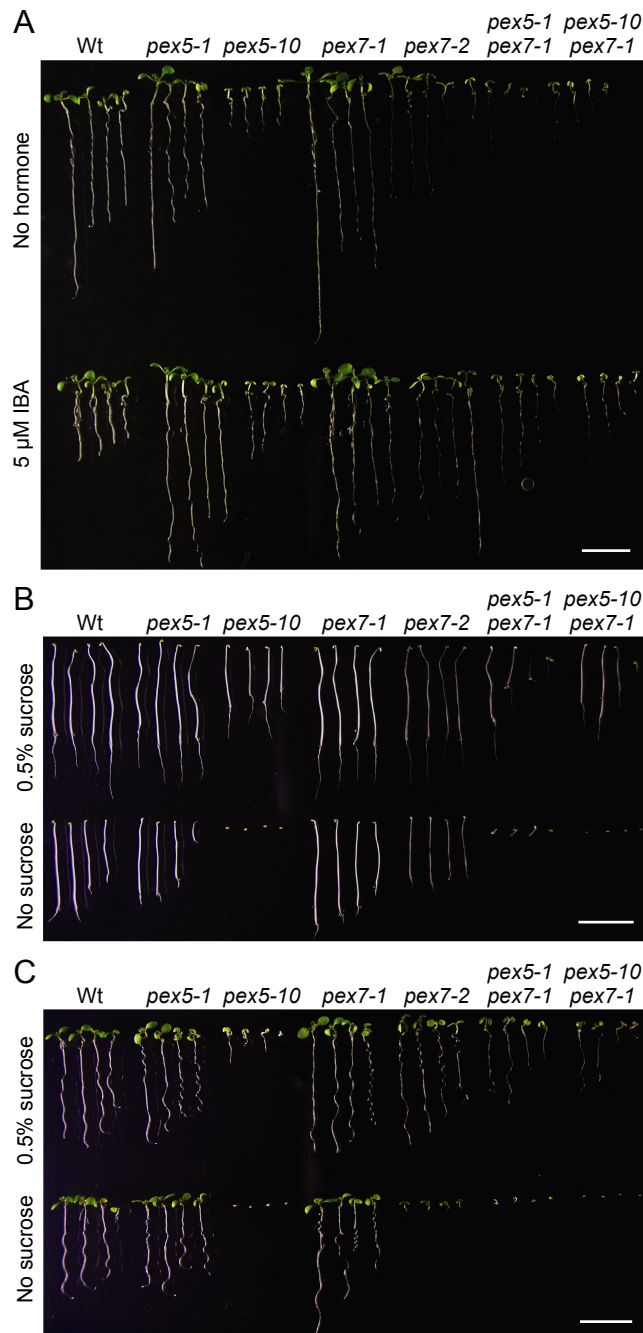

**Supplemental Figure 1.** *pex7-2* IBA resistance and sucrose dependence suggest IBA and fatty acid  $\beta$ -oxidation defects. (A) *pex* mutants are resistant to root elongation inhibition by IBA. Seeds were stratified 3 days at 4°C prior to 8 days of growth under yellow-filtered light on medium without hormone or supplemented with IBA. Four seedlings representing the range of observed responses are shown; bar, 1 cm. (B) Sucrose dependence of dark-grown *pex* mutants. Seedlings were grown with or without sucrose for 1 day in light and 5 days in darkness. Four seedlings representing the range of observed hypocotyl lengths are shown; bar, 1 cm. (C) Sucrose dependence of light-grown *pex* mutants. Seedlings were grown for 8 days with or without sucrose under white light. Four seedlings representing the range of observed responses are shown. Bar, 1 cm.

**Supplemental Table 1.** PCR-based markers used in *pex7-2* mapping.

| Marker | Oligonucleotide pair                                                                     | Enzyme   | Product sizes (bp) |     | Reference            |
|--------|------------------------------------------------------------------------------------------|----------|--------------------|-----|----------------------|
|        |                                                                                          |          | Col                | Ler |                      |
| nga63  | nga63-1,<br>CCCAAGTGATCACCACCGAAGCCC<br>nga63-2,<br>GTGCCTAAACCAAGGCACAGAAGCGC           | --       | 111                | 89  | Bell and Ecker, 1994 |
| F28N24 | F28N24-1,<br>CTTGATGCAAATCCATAGGAAGTGAGTCA<br>F28N24-2,<br>CCGTTTGCAGGCATGATATAAACCTGTCA | --       | 257                | 219 | This work            |
| F27G20 | F27G20-1,<br>CACATGCTTAGCGAGATTCCACATTCCAT<br>F27G20-2,<br>ATAGCGAGGAATTGACGAATCCTCTAGAG | --       | 179                | 166 | Fujibe, 2006         |
| F6N18  | F6N18-2,<br>ATTGATTTCTAACTCCA ACTCTACATAGC<br>F6N18-4,<br>GTTTGTGTTCTTTGTTGTTTCTTTTAG    | --       | 202                | 181 | Woodward, 2005       |
| T9L6   | T9L6-1,<br>CCAAGTATTT CAGGTATTCAGGTA CT TGT<br>T9L6-2,<br>GGTTAAATATACAACCATT CCTAGCCCA  | HpyCH4IV | 313<br>121         | 434 | Magidin, 2002        |

## References:

- Bell CJ, Ecker JR (1994) Assignment of 30 microsatellite loci to the linkage map of *Arabidopsis*. *Genomics* **19**, 137-144.
- Fujibe T, Saji H, Watahiki MK, Yamamoto KT (2006) Overexpression of the *RADICAL-INDUCED CELL DEATH1 (RCD1)* gene of *Arabidopsis* causes weak *rcd1* phenotype with compromised oxidative-stress responses. *Biosci. Biotechnol. Biochem.* **70**, 1827-1831
- Magidin M (2002) Genetic analysis of auxin homeostasis: Conjugate sensitivity and auxin supersensitivity. Ph.D. thesis, Department of Biochemistry and Cell Biology (Rice University, Houston, Texas), 170 pages.
- Woodward AW (2005) Genes, organelles, and molecules that influence plant development through auxin regulation. Ph.D. thesis, Department of Biochemistry and Cell Biology (Rice University, Houston, Texas), 226 pages.

**Supplemental Table 2.** Primers used for subcloning.

---

| Oligonucleotide name | Sequence (5' to 3')                      |
|----------------------|------------------------------------------|
| PEX5-SalIF           | GCGGAGGAGTAGAAACCCGTTGGAAACATGGCGATGAGAG |
| PEX7-SalI-F          | GTCGACGAAGCTATGCCGGTG                    |
| PEX7-NotI-R          | GCGGCCGCTCAACTGGCTCTAGGATCC              |
| PED1-SalI-F1         | GTCGACAAGAAAAAATGGAGAAA                  |
| PED1-NotI-R          | GCGGCCGCCTAGCGAGCGTCCTT                  |
| PED1-SalI-F2         | GTCGACAAGAAAAAATGTTGGCT                  |

---
